# Supplementary material for: Functionalized polymer modified buried interface for enhanced efficiency and stability of perovskite solar cells
Source: Royal Society of Chemistry journal article supplement (doi:10.1039/d2nr06290a), 2022-12-22
Supplement: d2nr06290a1.pdf [file d2nr06290a1.pdf]

## **Functionalized Polymer Modified Buried Interface for Enhanced Efficiency and Stability of Perovskite Solar Cells**

*Hanjun Zou<sup>1</sup>, Huan Bi<sup>2\*</sup>, Yongheng Chen<sup>3</sup>, Mengna Guo<sup>4</sup>, Wenjing Hou<sup>4</sup>, Pengyu Su<sup>5</sup>, Kai Zhou<sup>1</sup>, Chuanyao Yang<sup>1</sup>, Xiangnan Gong<sup>1</sup>, Li Xiao<sup>6</sup>, Li Liu<sup>3\*</sup>*

<sup>1</sup> Analytical and Testing Center, Chongqing University, Chongqing 401331, China.

<sup>2</sup> Faculty of Informatics and Engineering, The University of Electro-Communications, Tokyo 182-8585, Japan.

<sup>3</sup> Joint Laboratory for Extreme Conditions Matter Properties, School of Mathematics and Physics, Southwest University of Science and Technology, Mianyang 621010, China

<sup>4</sup> Institute of Molecular Science, Key Laboratory of Materials for Energy Conversion and Storage of Shanxi Province, Shanxi University, Taiyuan 030006, China

<sup>5</sup> School of Electronic Information Engineering, Yangtze Normal University, Chongqing 408100, China

<sup>6</sup> Chongqing Key Laboratory of Green Energy Materials Technology and Systems, Chongqing University of Technology, Chongqing 400054, China.

### **Corresponding Author (H. Bi, and L. Liu)**

e-mail: [hbi.trans.sci@uec.ac.jp](mailto:hbi.trans.sci@uec.ac.jp)

e-mail: [liuli\\_phy@swust.edu.cn](mailto:liuli_phy@swust.edu.cn)

## Experimental Section

### Materials and solvents

SnO<sub>2</sub> colloidal solution (15 wt% in water) was brought from Alfa Aesar. Lead (II) bromide (PbBr<sub>2</sub>, 99.9%), Formamidinium hydroiodide (FAI, 99.9%), bis(trifluoromethane) sulfonimide lithium salt (Li-TFSI, 99%), 2,2',7,7'-Tetrakis[N,N-di(4-methoxyphenyl)amino]-9,9'-spirobifluorene (Spiro-OMeTAD, 99.86%) and 4-*tert*-butyl pyridine (*t*BP, 99%) were purchased from Advanced Election Technology CO., Ltd. Lead (II) iodide (PbI<sub>2</sub>, 99.99%), Methylammonium bromide (MABr, 99.9%), lead (II) chloride (PbCl<sub>2</sub>, 99.99%) and methylamine hydrochloride (MACl, 99.5%) were purchased from Xi'an Polymer Light Technology Corp. Cesium iodide (CsI, 99.99%) and Rubidium iodide (RbI) were obtained from Aladdin. Povidone-iodine (PV-I) was got from Macklin. Chlorobenzene (CB, >99.9% purity), N, N-dimethylformamide (DMF, 99.8%) and dimethyl sulfoxide (DMSO, 99.8%) were purchased from Sigma-Aldrich. All the chemicals were used without further purification.

### Device Fabrication:

Laser patterned ITO glasses (7~9 Ω per square) were ultrasonically cleaned with detergent water and ethanol for 20 min in sequence. After being blown dry by nitrogen (99.99%), the ITO was treated by ultraviolet ozone (UV-O<sub>3</sub>) for 20 min. Then, the SnO<sub>2</sub> colloidal solution was prepared by mixing the SnO<sub>2</sub> solution and deionized water at a volume rate of 1/3. Diluted SnO<sub>2</sub> colloidal solution was spin-coated on the ITO substrates at 3000 rpm for 30 s and then the SnO<sub>2</sub> film was annealed at 150 °C for 30 min. After cooling down to room temperature and then treated by UV-O<sub>3</sub> for 20 min. For PV-I treated, different concentrations of PV-I (0, 0.2, 0.5, and 1 mg/mL) were dissolving in DMSO, and then 30 μL of PV-I was spin-coated onto the SnO<sub>2</sub> film at a speed of 5000 rpm for 30s without further annealing. Then, all substrates were transferred to an argon-filled glovebox for perovskite deposition. The 1.55 M perovskite (Rb<sub>0.02</sub>(FA<sub>0.95</sub>Cs<sub>0.05</sub>)<sub>0.98</sub>PbI<sub>2.91</sub>Br<sub>0.03</sub>Cl<sub>0.06</sub>) precursor solution was prepared by dissolving FAI of 248.16 mg, CsI of 19.73 mg, RbI of 6.58 mg, PbI<sub>2</sub> of 682.73 mg, and PbBr<sub>2</sub> of 8.53 mg PbCl<sub>2</sub> of 12.74 mg, and MACl (additive) of 35 mg in the mixed solvents of DMF and DMSO ( $V_{\text{DMF}} : V_{\text{DMSO}} = 4 : 1$ ). The as-prepared perovskite precursor solution was filter by the 0.22 μm PTFE filter before use. The perovskite film was deposited by the consecutively spin-coating process at 4000 rpm for 30 s where 80 μL CB antisolvent was dripped on perovskite films at 16 s before

ending the program, and the film was then annealed at 130 °C for 30 min. The Spiro-OMeTAD solution was prepared by mixing 72.3 mg Spiro-OMeTAD, 28.8  $\mu\text{L}$  of 4-*tert*-butyl pyridine (*t*BP) and 17.5  $\mu\text{L}$  of lithium bis(trifluoromethane sulfonyl)imide (Li-TFSI) stock solution (520 mg Li-TSFI in 1 mL acetonitrile) in 1 mL CB. Subsequently, 20  $\mu\text{L}$  Spiro-OMeTAD solution was spin-coated onto the perovskite films at 4000 rpm for 33 s to form the hole transport layer. Finally, about 100 nm metal counter electrode was thermally evaporated on the top of Spiro-OMeTAD film under a vacuum of  $3 \times 10^{-5}$  Pa through using a shadow mask.

### **Characterization:**

*J-V* curves were obtained using a solar simulator equipped and a Keithley 2400 source meter, and the black metal mask was employed to define the effective active area of the device to be 0.1 cm<sup>2</sup>. *J-V* curves were measured from -0.01 V to 1.15 V (forward scan) or from 1.15 V to -0.01 V (reverse scan) with a scan rate of 110 mV/s. The PCE of the PSCs was tested under air and dark conditions. XRD, Polar diagram and grazing incidence X-ray diffraction (GIXRD) patterns were collected using a PANalytical Empyrean diffractometer equipped with a Cu K $\alpha$  radiation ( $\lambda = 1.54056 \text{ \AA}$ ). XPS measurements were performed on a Thermo-Fisher ESCALab 250Xi system with a monochromatized Al K $\alpha$  under the pressure of  $5.0 \times 10^{-7}$  Pa. Fourier transformed infrared (FTIR) spectra were obtained on an FTIR spectrometer (Thermo Fisher Scientific). UV-Vis spectra were measured on an Agilent 8453 UV-Vis G1103A spectrometer. PL and TRPL were recorded by Edinburgh FLS1000, where the excitation wavelength of TRPL was provided by a 450 nm laser. SEM images were performed on SEM (JXA-8530F Plus).

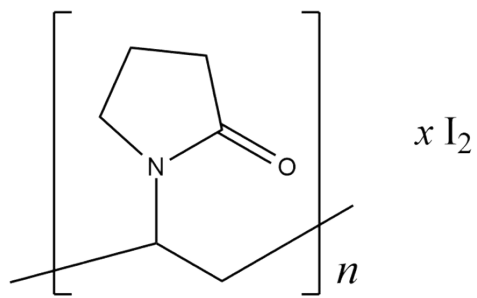

**Figure S1** The structures of the PV-I.

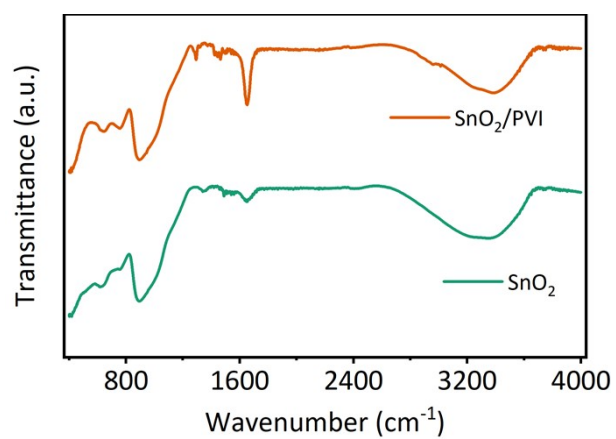

**Figure S2** FTIR spectra of the SnO<sub>2</sub> without or with PV-I modification.

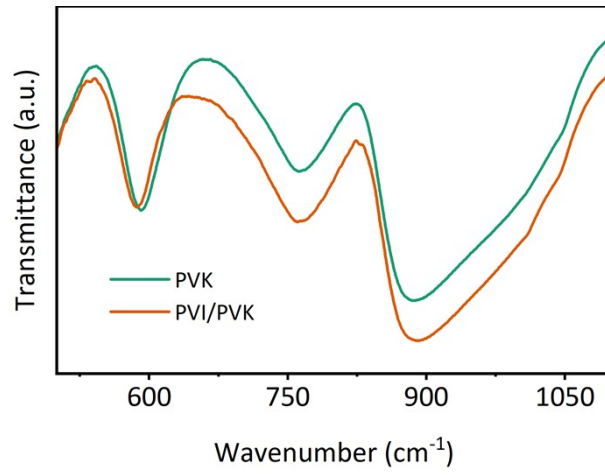

**Figure S3** FTIR spectra of the pure perovskite and perovskite modified by PV-I.

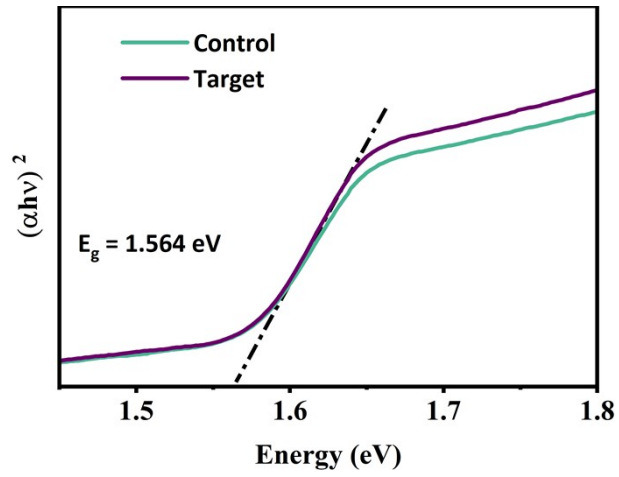

**Figure S4** Tauc plots of the perovskite film with or without PV-I modification.

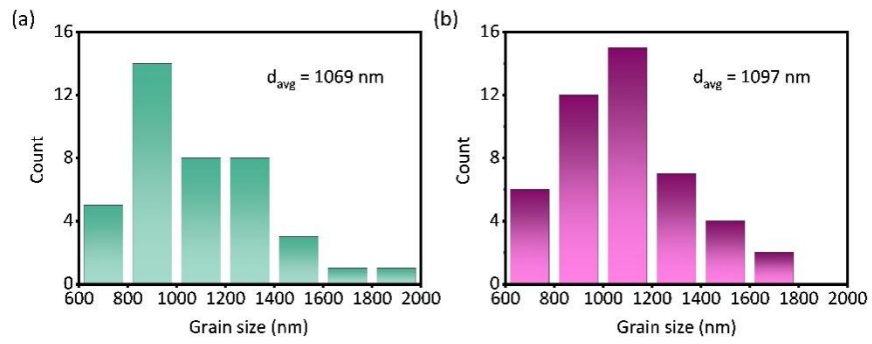

**Figure S5** Grain size distribution statistics with the perovskite film (a) without and (b) with PV-I modification.



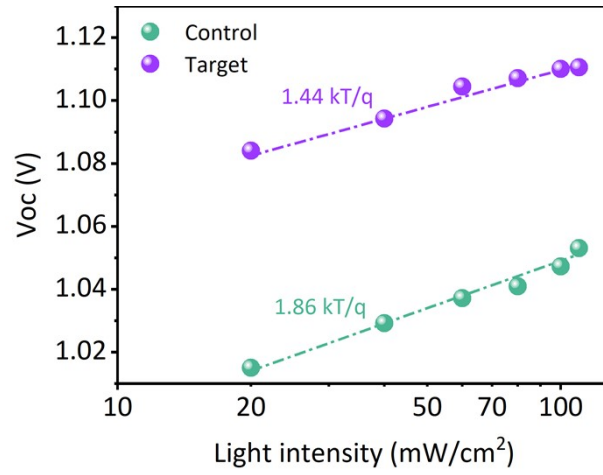

**Figure S6** Light-intensity-dependent  $V_{OC}$  of the control and target devices.

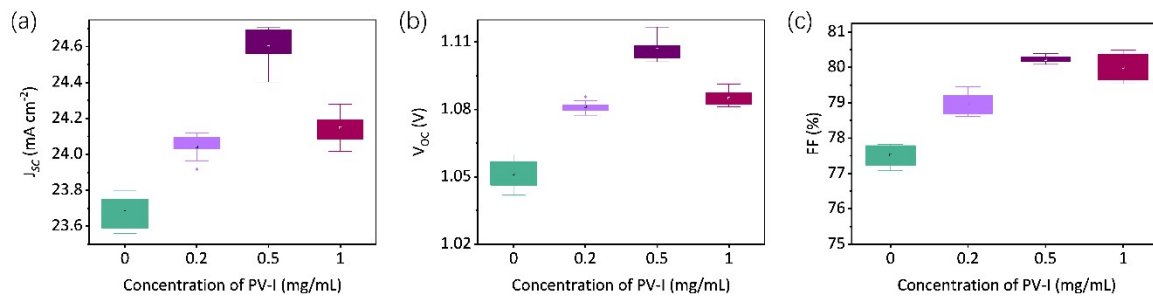

**Figure S7.** (a)  $J_{SC}$ , (b)  $V_{OC}$ , and (c) FF statistical diagrams of the devices modified by different concentrations of PV-I. The statistical data were collected from 20 cells for each concentration.

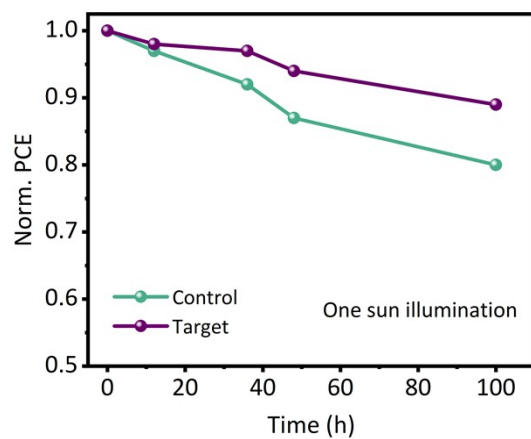

**Figure S8** PCE evolution of the devices based on SnO<sub>2</sub> without and with PV-I modification aged under one sun illumination where the devices were located in the glovebox.

Table S1 Fitting results from TRPL kinetics in Figure 4b.

|                          | Glass/PVK | Glass/PV-I/PVK |
|--------------------------|-----------|----------------|
| $\tau_1$ (ns)            | 134.90    | 30.59          |
| %                        | 28.7      | 12.0           |
| $\tau_2$ (ns)            | 447.56    | 911.45         |
| %                        | 71.2      | 87.9           |
| $\tau_{\text{ave}}$ (ns) | 413.7     | 907.4          |

Table S2 Fitting results from TRPL dynamics in Figure 4d.

|                          | ITO/SnO <sub>2</sub> /PVK | ITO/SnO <sub>2</sub> /PV-I/PVK |
|--------------------------|---------------------------|--------------------------------|
| $\tau_1$ (ns)            | 66.87                     | 12.13                          |
| %                        | 79.4                      | 77.7                           |
| $\tau_2$ (ns)            | 264.29                    | 144.91                         |
| %                        | 20.6                      | 22.3                           |
| $\tau_{\text{ave}}$ (ns) | 166.9                     | 114.7                          |
